# Supplementary material for: Metabolic Capacity of the Antarctic Cyanobacterium Phormidium pseudopriestleyi That Sustains Oxygenic Photosynthesis in the Presence of Hydrogen Sulfide
Source: PubMed Central journal article supplement (PMC8002359; doi:10.3390/genes12030426), 2021-03-16
Supplement: genes-12-00426-s001.pdf [file genes-12-00426-s001.pdf]

## PHOTOSYNTHESIS

### Photosystem II

|         |     |                                                   |
|---------|-----|---------------------------------------------------|
| PsbA    | yes | Photosystem II P680 reaction center D1 protein    |
| PsbD    | yes | Photosystem II P680 reaction center D2 protein    |
| PsbC    | yes | Photosystem II CP43 chlorophyll apoprotein        |
| PsbB    | yes | Photosystem II CP47 chlorophyll apoprotein        |
| PsbE    | yes | Photosystem II cytochrome b559 subunit alpha      |
| PsbF    | yes | Photosystem II cytochrome b559 subunit beta       |
| PsbL    | yes | Photosystem II PsbL protein                       |
| PsbJ    | yes | Photosystem II PsbJ protein                       |
| PsbK    | yes | Photosystem II PsbK protein                       |
| PsbM    | yes | Photosystem II PsbM protein                       |
| PsbH    | yes | Photosystem II PsbH protein                       |
| PsbI    | yes | Photosystem II PsbI protein                       |
| PsbO    | yes | Photosystem II oxygen-evolving enhancer protein 1 |
| PsbP    | yes | Photosystem II oxygen-evolving enhancer protein 2 |
| PsbQ    | no  | Photosystem II oxygen-evolving enhancer protein 3 |
| PsbR    | no  | Photosystem II 10 kDa protein                     |
| PsbS    | no  | Photosystem II 22kDa protein                      |
| PsbT    | yes | Photosystem II PsbT protein                       |
| PsbU    | yes | Photosystem II PsbU protein                       |
| PsbV    | yes | Photosystem II cytochrome c550                    |
| PsbW    | no  | Photosystem II PsbW protein                       |
| PsbX    | yes | Photosystem II PsbX protein                       |
| PsbY    | yes | Photosystem II PsbY protein                       |
| PsbZ    | yes | Photosystem II PsbZ protein                       |
| Psb27   | yes | Photosystem II Psb27 protein                      |
| Psb28   | yes | Photosystem II 13kDa protein                      |
| Psb28-2 | no  | Photosystem II Psb28-2 protein                    |

### Photosystem I

|      |     |                                                |
|------|-----|------------------------------------------------|
| PsaA | yes | Photosystem I P700 chlorophyll a apoprotein A1 |
| PsaB | yes | Photosystem I P700 chlorophyll a apoprotein A2 |
| PsaC | yes | Photosystem I subunit VII                      |
| PsaD | yes | Photosystem I subunit II                       |
| PsaE | yes | Photosystem I subunit IV                       |
| PsaF | yes | Photosystem I subunit III                      |
| PsaG | no  | Photosystem I subunit V                        |
| PsaH | no  | Photosystem I subunit VI                       |
| PsaI | yes | Photosystem I subunit VIII                     |
| PsaJ | no  | Photosystem I subunit IX                       |

|      |     |                              |
|------|-----|------------------------------|
| PsaK | yes | Photosystem I subunit X      |
| PsaL | yes | Photosystem I subunit XI     |
| PsaM | yes | Photosystem I subunit XII    |
| PsaN | no  | Photosystem I subunit PsaN   |
| PsaO | no  | Photosystem I subunit PsaO   |
| PsaX | no  | Photosystem I 4.8kDa protein |

#### Cytochrome b6/f complex

|      |     |                                             |
|------|-----|---------------------------------------------|
| PetB | yes | cytochrome b6                               |
| PetD | yes | cytochrome b6-f complex subunit 4           |
| PetA | yes | apocytochrome f                             |
| PetC | yes | cytochrome b6-f complex iron-sulfur subunit |
| PetL | no  | cytochrome b6-f complex subunit 6           |
| PetM | no  | cytochrome b6-f subunit 7                   |
| PetN | no  | cytochrome b6-f complex subunit 8           |
| PetG | no  | cytochrome b6-f complex subunit 5           |

#### Photosynthetic electron transport

|      |     |                            |
|------|-----|----------------------------|
| PetE | no  | plastocyanin               |
| PetF | yes | ferredoxin                 |
| PetH | yes | ferredoxin-NaDP+ reductase |
| PetJ | yes | cytochrome c6              |

#### F-type ATPase

|      |     |                                                 |
|------|-----|-------------------------------------------------|
| atpD | yes | H+/Na+ transporting ATPase subunit beta         |
| atpA | yes | F-type H+/Na+ transporting ATPase subunit alpha |
| atpG | yes | H+ transporting ATPase subunit gamma            |
| atpH | yes | F-type H+ transporting ATPase subunit delta     |
| atpC | yes | F-type H+ transporting ATPase subunit epsilon   |
| atpE | yes | F-type H+ transporting ATPase subunit c         |
| atpB | yes | F-type H+ transporting ATPase subunit a         |
| atpF | yes | F-type H+ transporting ATPase subunit b         |
